# Supplementary material for: Magnetic-field-controlled counterion migration within polyionic liquid micropores enables nano-energy harvest
Source: Royal Society of Chemistry journal article supplement (doi:10.1039/d2nh00323f), 2022-01-01
Supplement: d2nh00323f1.pdf [file d2nh00323f1.pdf]

## Support information

### **Magnetic-field-controlled counterion migration within polyionic liquid micropores enables nano-energy harvest**

Tao Xiao<sup>a,b,†</sup>, Jingyu Wang<sup>a,b,†</sup>, Jiahui Guo<sup>a,b</sup>, Xing Zhao<sup>a</sup>, and Yong Yan<sup>a,b,c,\*</sup>

*<sup>a</sup>CAS Key Laboratory of Nanosystem and Hierarchical Fabrication, CAS Center for Excellence in Nanoscience, National Center for Nanoscience and Technology, Beijing 100190, China*

*<sup>b</sup>University of Chinese Academy of Sciences, Beijing, 100049, China*

*<sup>c</sup>Department of Chemistry, School of Chemistry and Biological Engineering, University of Science and Technology Beijing, Beijing 100083, China*

*<sup>†</sup>These authors contributed equally to this work.*

*\*Correspondence to: [yany@nanoctr.cn](mailto:yany@nanoctr.cn) (Y.Y.)*

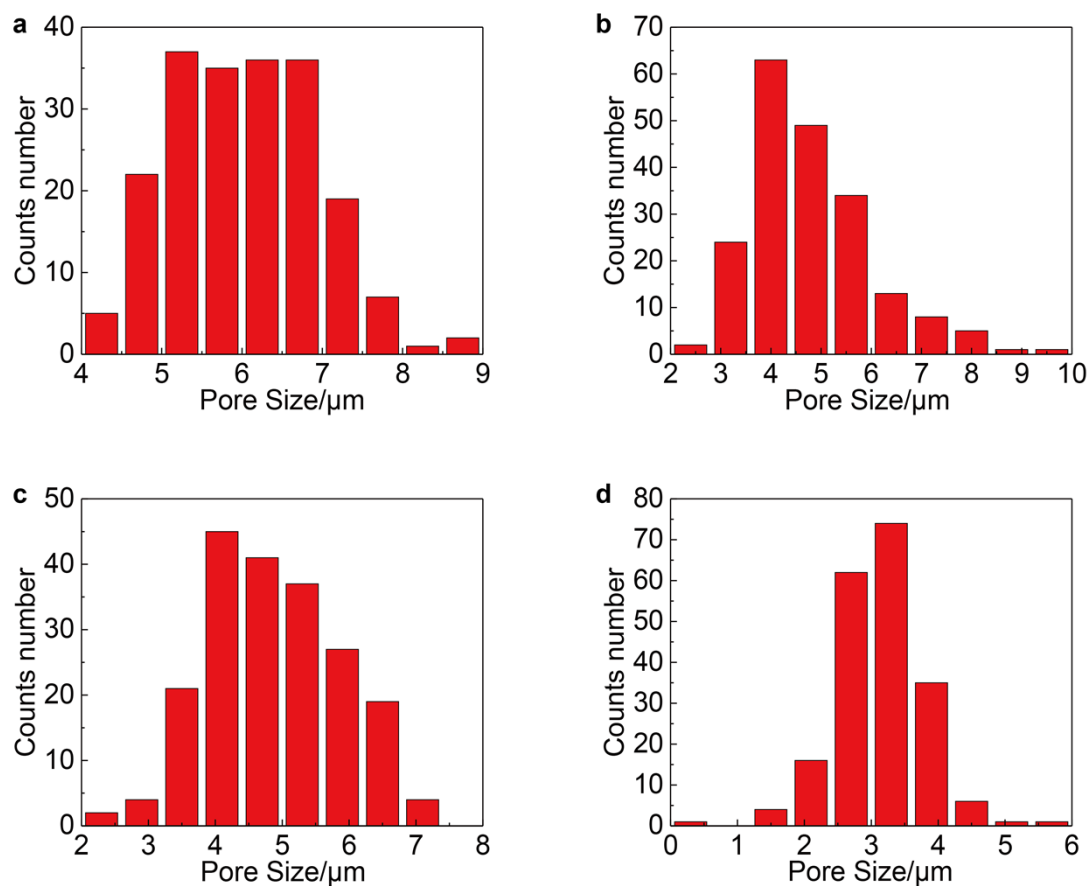

**Fig. S1.** Size distribution of PLM prepared with (a) 5 mg/mL, (b) 15 mg/mL, (c) 25 mg/mL, and (d) 45 mg/mL photoinitiator concentration. Other synthesis conditions: 3 hrs UV irradiation, 72 hrs water treatment under room temperature.

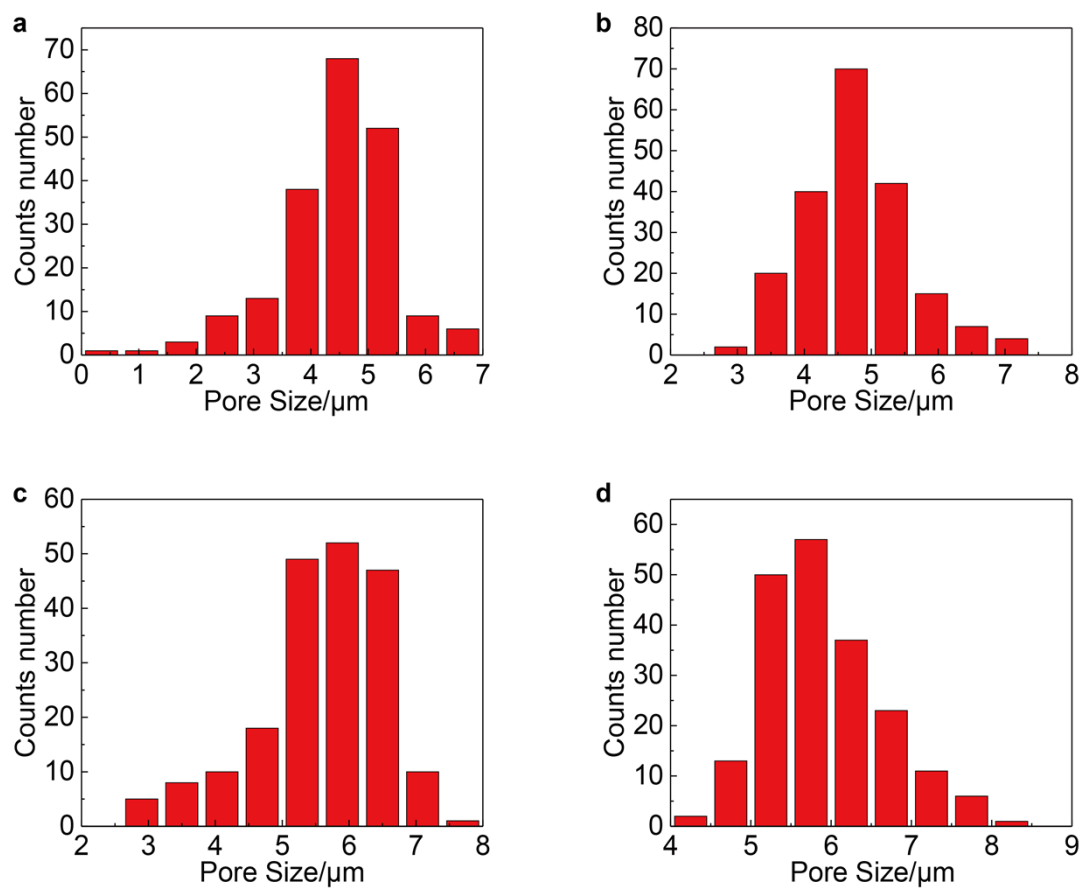

**Fig. S2.** Size distribution of PLM prepared with (a) 0.5 hrs, (b) 1.0 hr, (c) 2.0 hrs, and (d) 3.0 hrs UV irradiation. The other fabrication conditions are 5 mg/mL photoinitiator, and 72 hrs water treatment under room temperature.

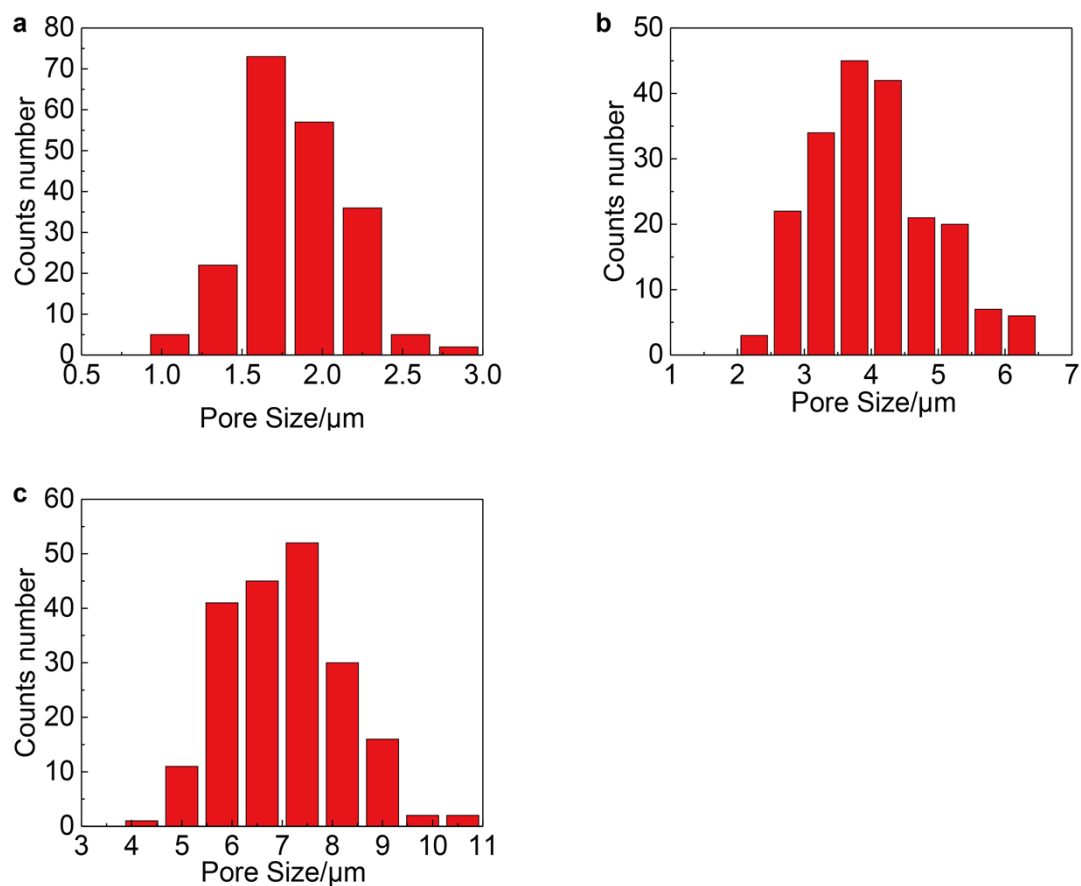

**Fig. S3.** Size distribution of PLM prepared with (a) 24 hrs, (b) 48 hrs, and (c) 96 hrs water treatment. The other fabrication conditions are 5 mg/mL photoinitiator, and 3 hrs UV irradiation under room temperature.

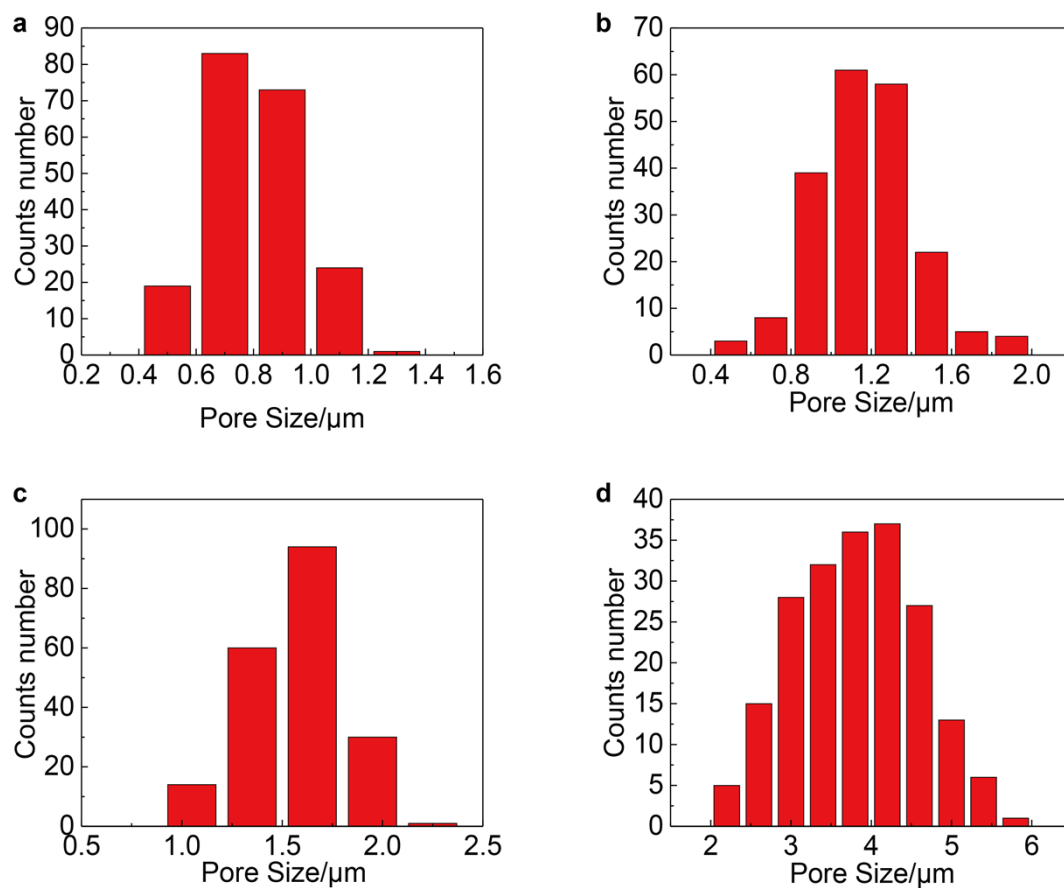

**Fig. S4.** Size distribution of PLM prepared with (a) 25°C, (b) 20°C, (c) 70°C, and (d) 90°C water treatment temperature. The other fabrication conditions are 5 mg/mL photoinitiator, 3 hrs UV irradiation, and 12 hrs water treatment.

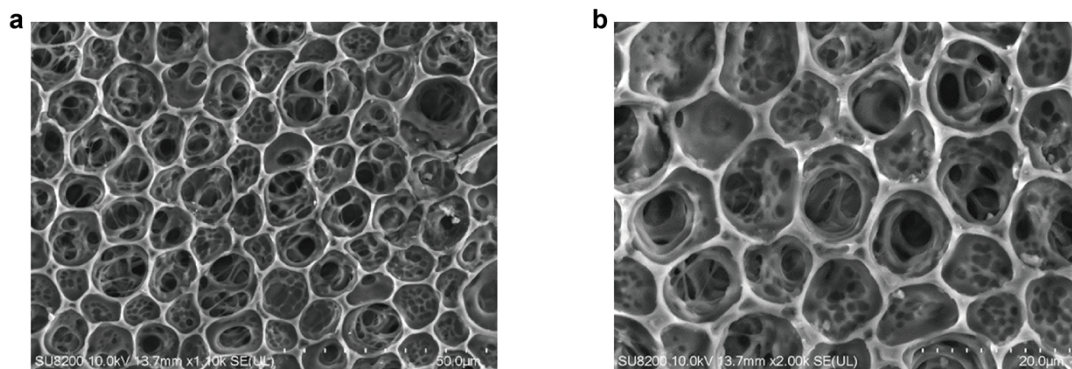

**Fig. S5.** SEM images of PLM after one week of water treatment.

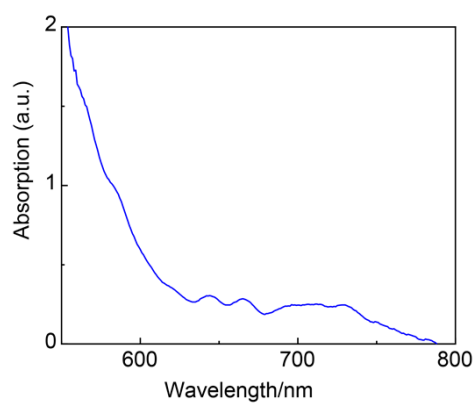

**Fig. S6.** UV-vis spectrum of in 1-(10-mercaptodecyl)-3-methylimidazolium ferric chloride bromide.

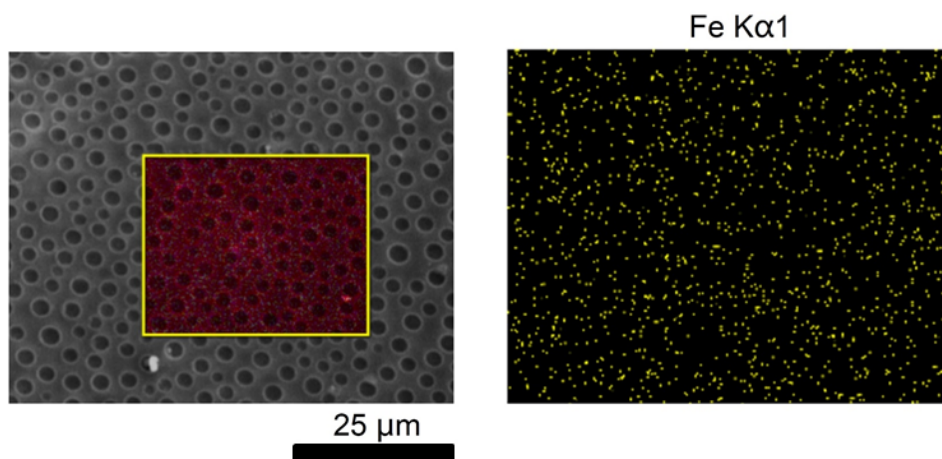

**Fig. S7.** EDS mapping of Fe element within mag-PLM prepared by using MIL 1-(10-mercaptodecyl)-3-methylimidazolium ferric chloride bromide.

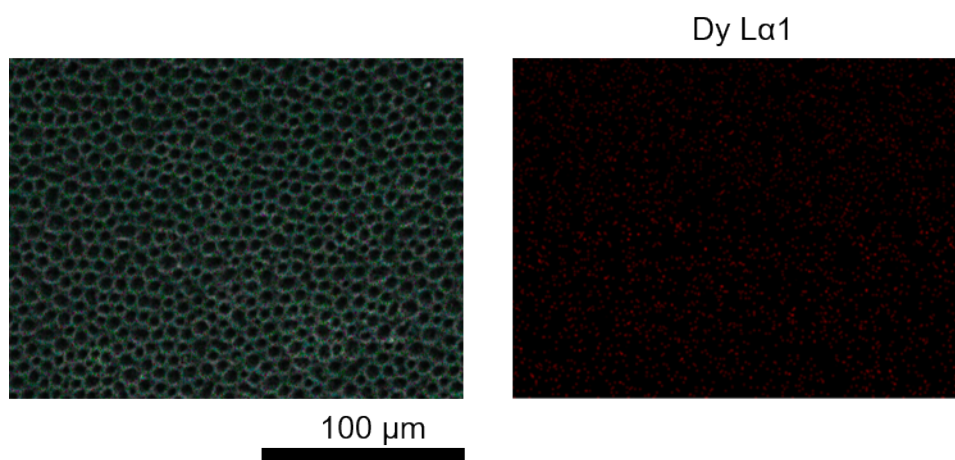

**Fig. S8.** EDS mapping of Dy element within mag-PLM prepared by using MIL 1-(10-mercaptodecyl)-3-methylimidazolium dysprosium chloride bromide.

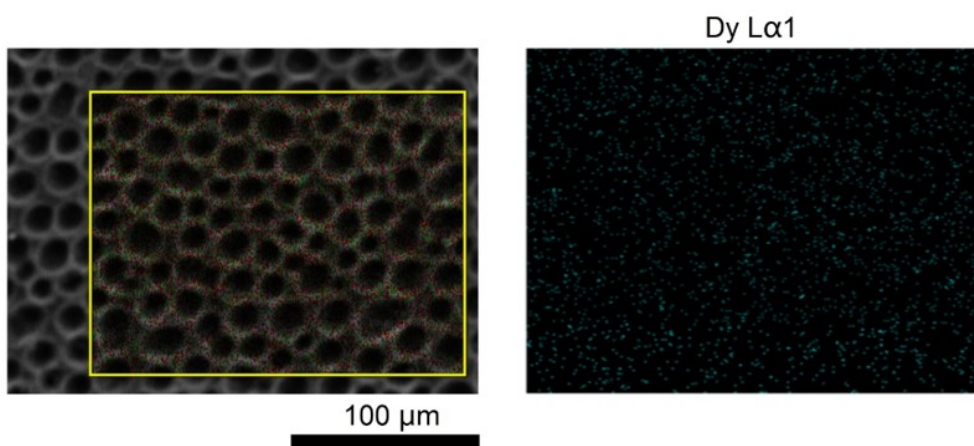

**Fig. S9.** EDS mapping of Dy element within mag-PLM prepared by using MIL 1-(10-mercaptopodecyl)-3-methylimidazolium dysprosium chloride bromide.

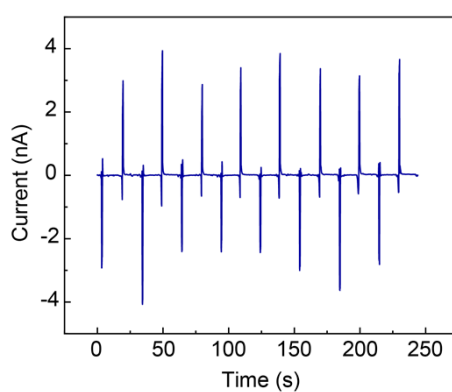

**Fig. S10.** Typical time-dependent short circuit current of a device fabricated by using mag-PLM synthesized with 24 hrs water treatment. The other fabrication conditions are 5 mg/mL photoinitiator, and 3 hrs UV irradiation under room temperature.



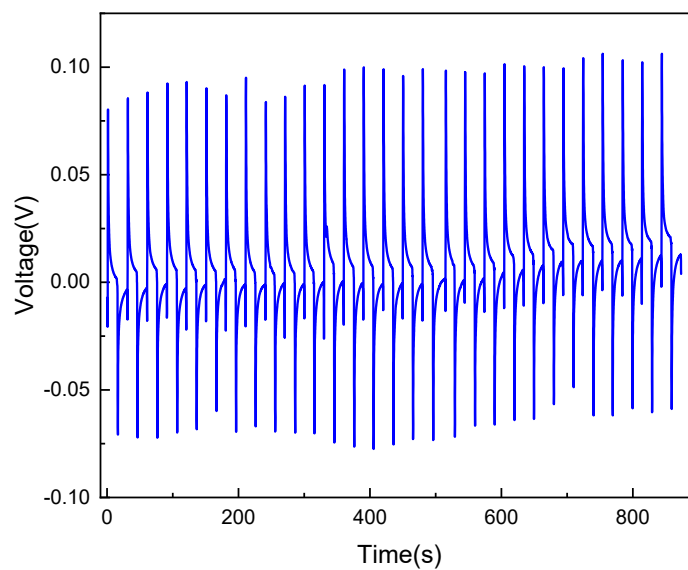

**Fig. S11.** Cycling (magnetic field on/off) performance of the magnetic energy harvesting device. The fabrication conditions are 5 mg/mL photoinitiator, 3 hrs UV irradiation, and 64 hrs water treatment under room temperature.

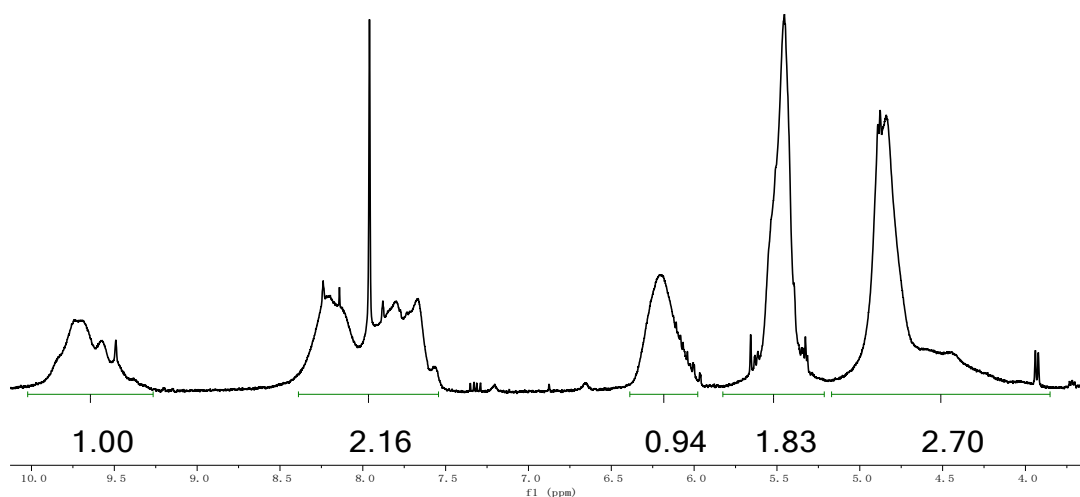

**Fig. S12.** NMR spectrum of poly(3-allylmethyl-1-vinylimidazole) bromide.

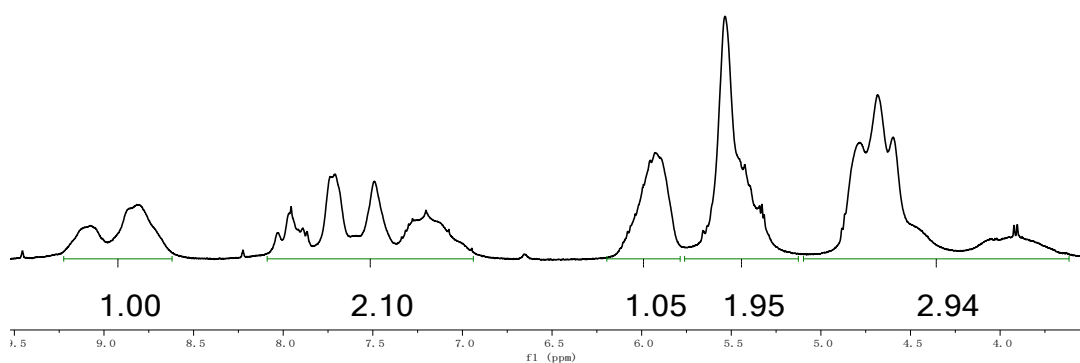

**Fig. S13.** NMR spectrum of poly(3-allylmethyl-1-vinylimidazole) bis(trifluoromethanesulfonyl)imide.

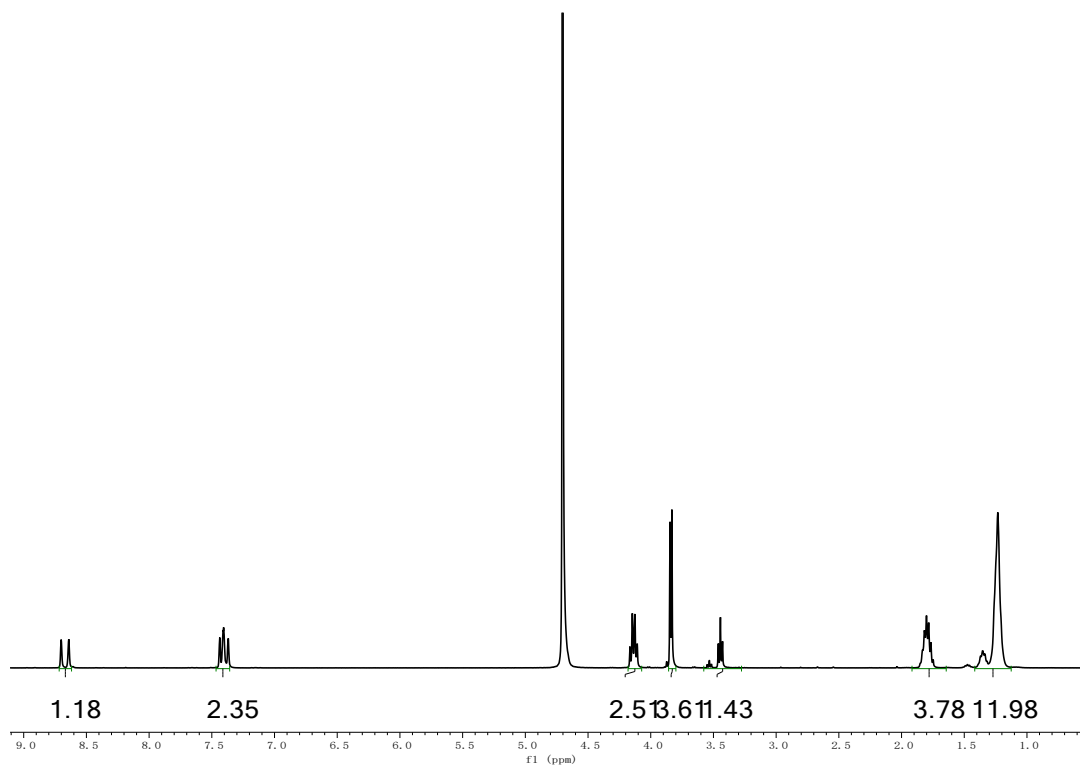

**Fig. S14.** NMR spectrum of 1-(10-Bromodecyl)-3- Methylimidazole.

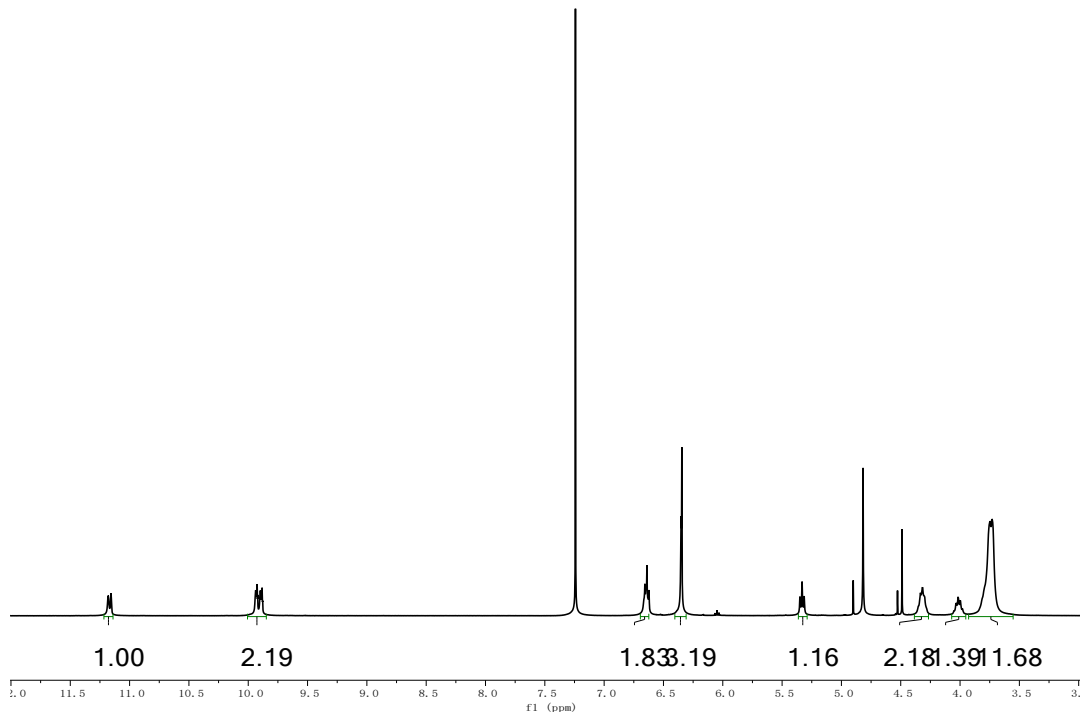

**Fig. S15.** NMR spectrum of 1-(10-thioethyl decyl)-3-methylimidazole bromide.

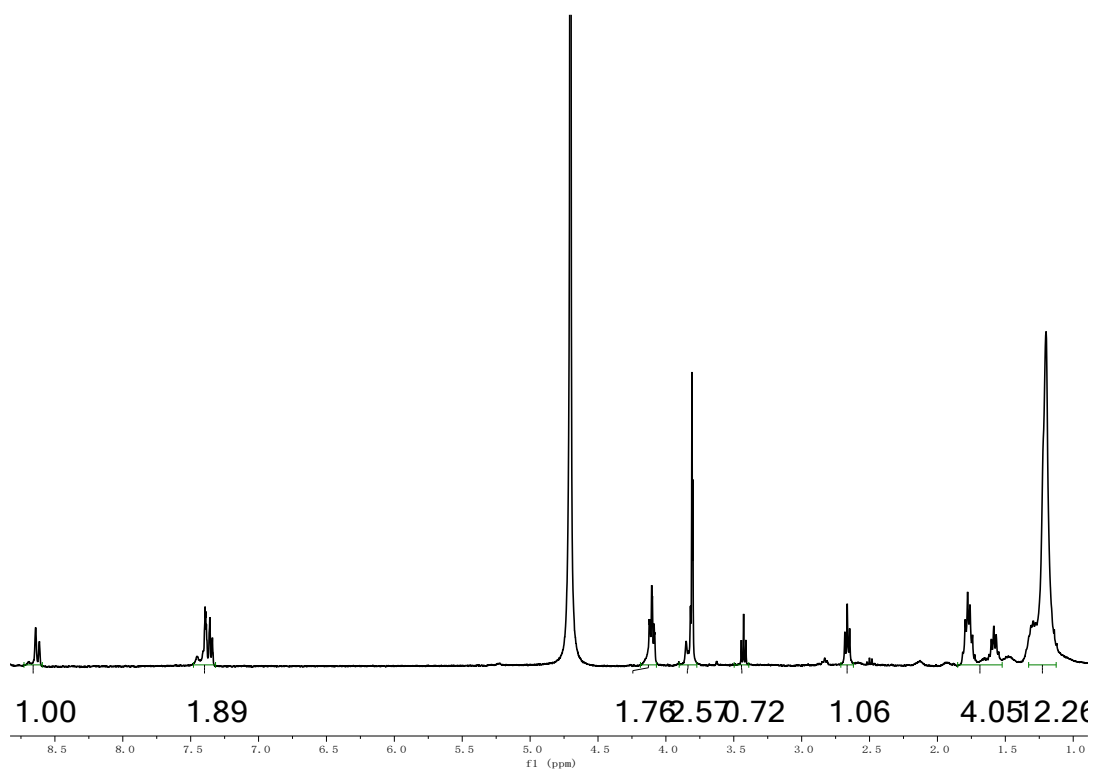

**Fig. S16.** NMR spectrum of 1-(10-mercaptodecyl)-3-methylimidazole bromide.

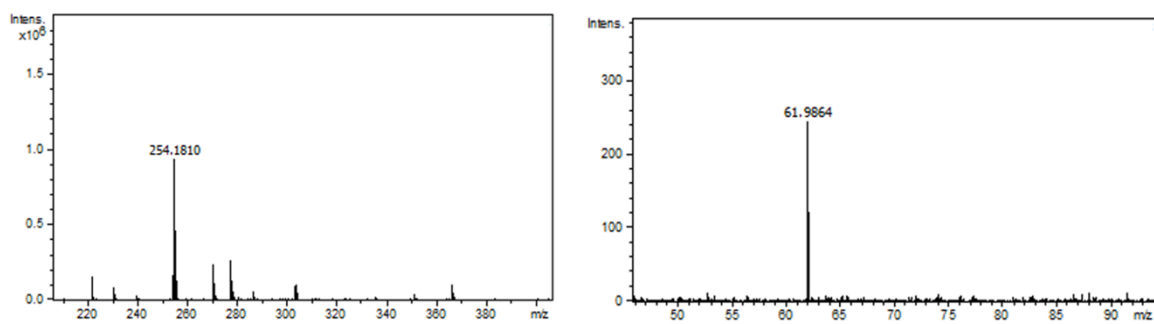

**Fig. S17.** Electrospray ionization mass spectrometry of 1-(10-mercaptodecyl)-3-methylimidazole nitrate.

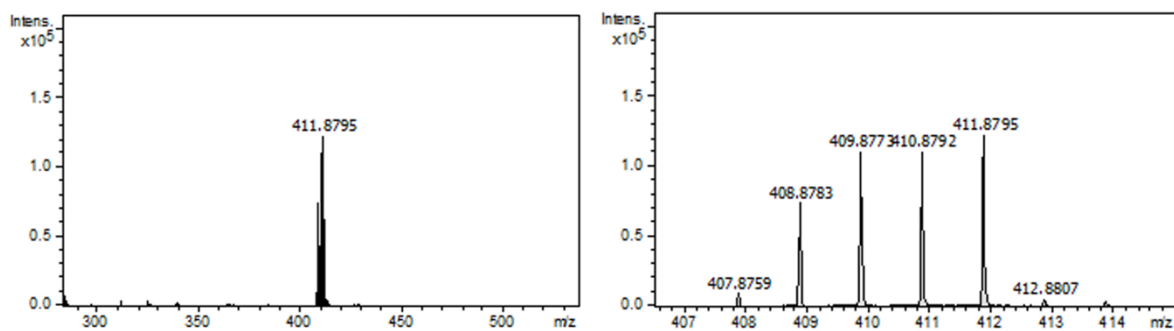

**Fig. S18.** Electrospray ionization mass spectrometry of 1-(10-mercaptodecyl)-3-methylimidazolium dysprosium tetranitrate.

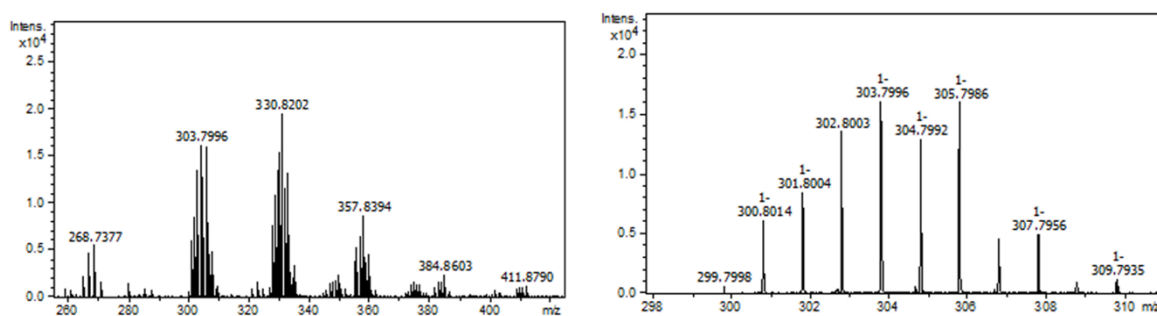

**Fig. S19.** Electrospray ionization mass spectrometry of 1-(10-mercaptodecyl)-3-methylimidazolium dysprosium chloride bromide.
